# Supplementary material for: Aberrant enhancer hypomethylation contributes to hepatic carcinogenesis through global transcriptional reprogramming
Source: PubMed Central journal article supplement (PMC6338783; doi:10.1038/s41467-018-08245-z), 2019-01-18
Supplement: 41467_2018_8245_MOESM1_ESM.pdf [file 41467_2018_8245_MOESM1_ESM.pdf]

Supplementary Information

**Aberrant Enhancer Hypomethylation Contributes to Hepatic Carcinogenesis through  
Global Transcriptional Reprogramming**

Xiong *et al.*

## Supplementary Figure Legends

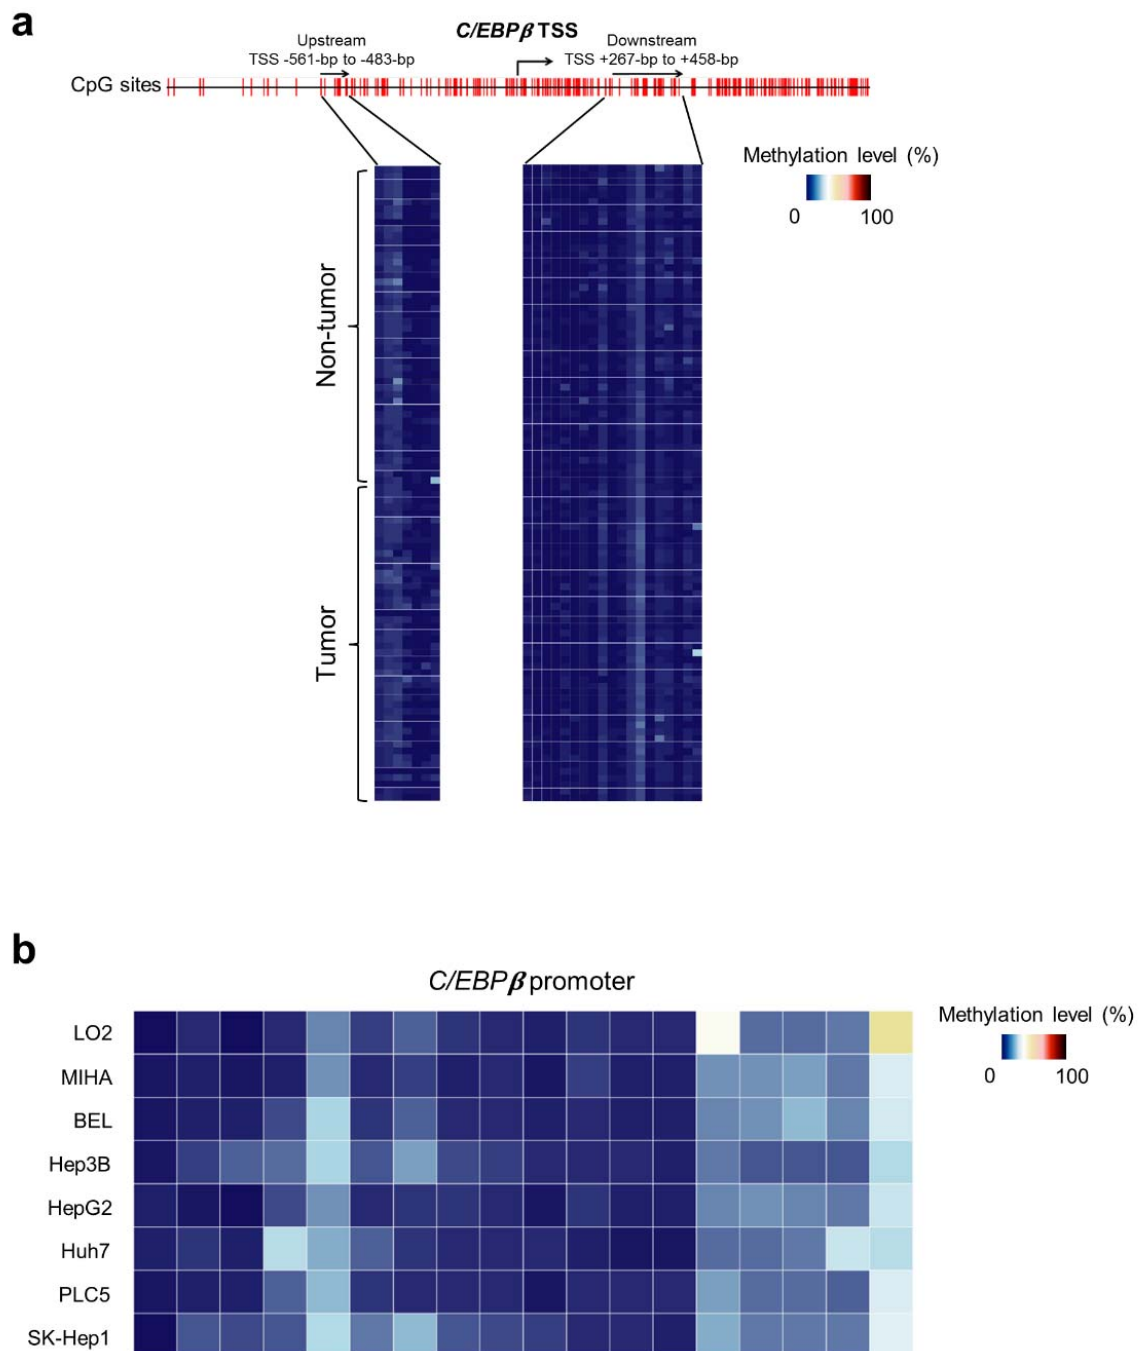

**Supplementary Figure 1.** Low *C/EBPβ* promoter methylation level in human HCC. (a-b) Pyrosequencing analysis of (a) 48 pairs of HCC tumor and non-tumor tissues (upstream and downstream of *C/EBPβ* TSS) and (b) 8 liver cell lines (downstream of *C/EBPβ* TSS).

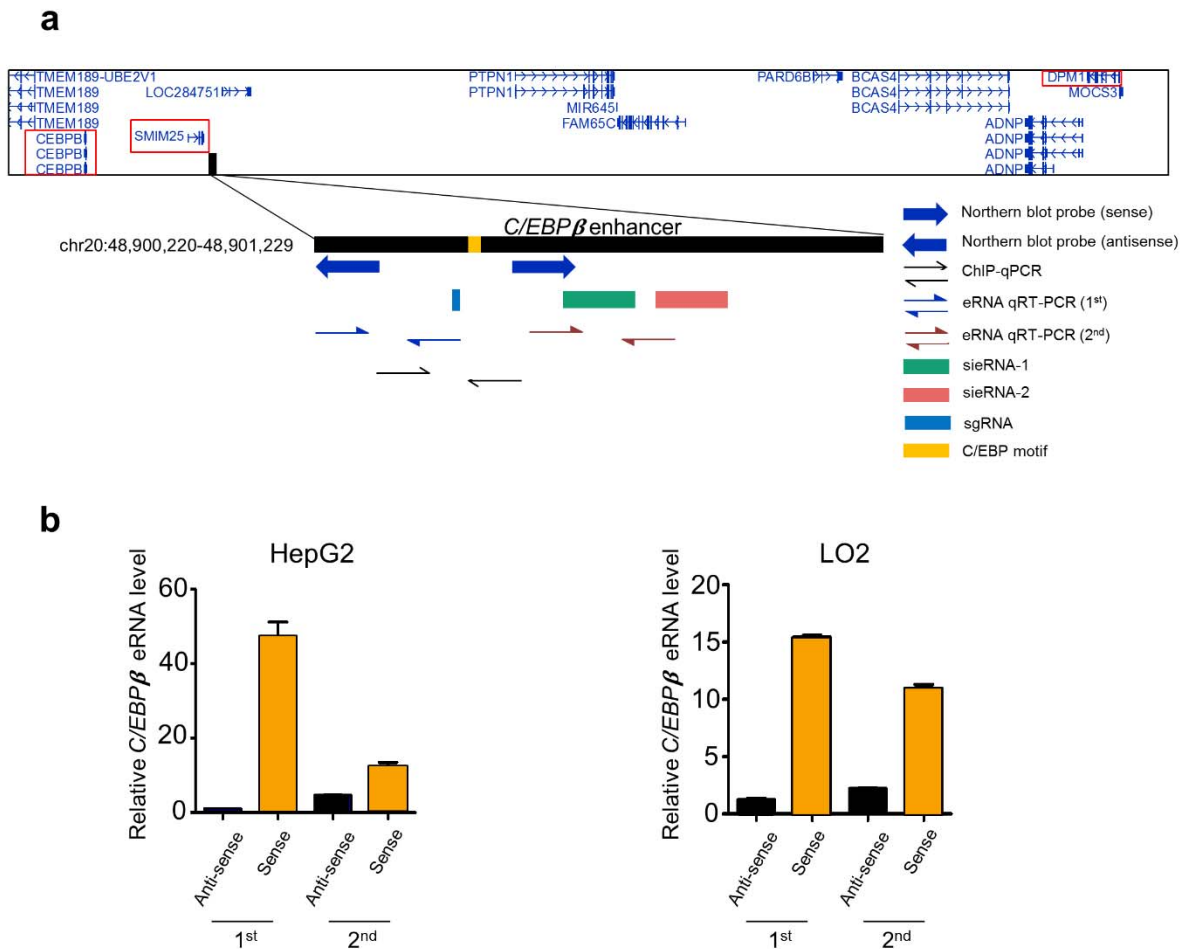

**Supplementary Figure 2.** Molecular analyses of *C/EBPβ* enhancer. (a) The binding positions of Northern blot probes, ChIP-qPCR primers, eRNA qRT-PCR primers, sgRNA, siRNA-1 and siRNA-2 at *C/EBPβ* enhancer containing the *C/EBP* motif are indicated in the diagram. (b) qRT-PCR analysis of *C/EBPβ* eRNA levels in the anti-sense and sense strands of two liver cell lines using two sets of primers. *C/EBPβ* eRNA levels were calculated by the  $2^{-\Delta\Delta C_t}$  method using 18s rRNA as internal control, and are presented as fold-changes against the average values of the respective anti-sense groups. As the qPCR signals generated from the anti-sense strand template were much lower than those from the sense strand, these findings suggest that *C/EBPβ* eRNA transcription was unidirectional. Data are presented as mean  $\pm$  SD.

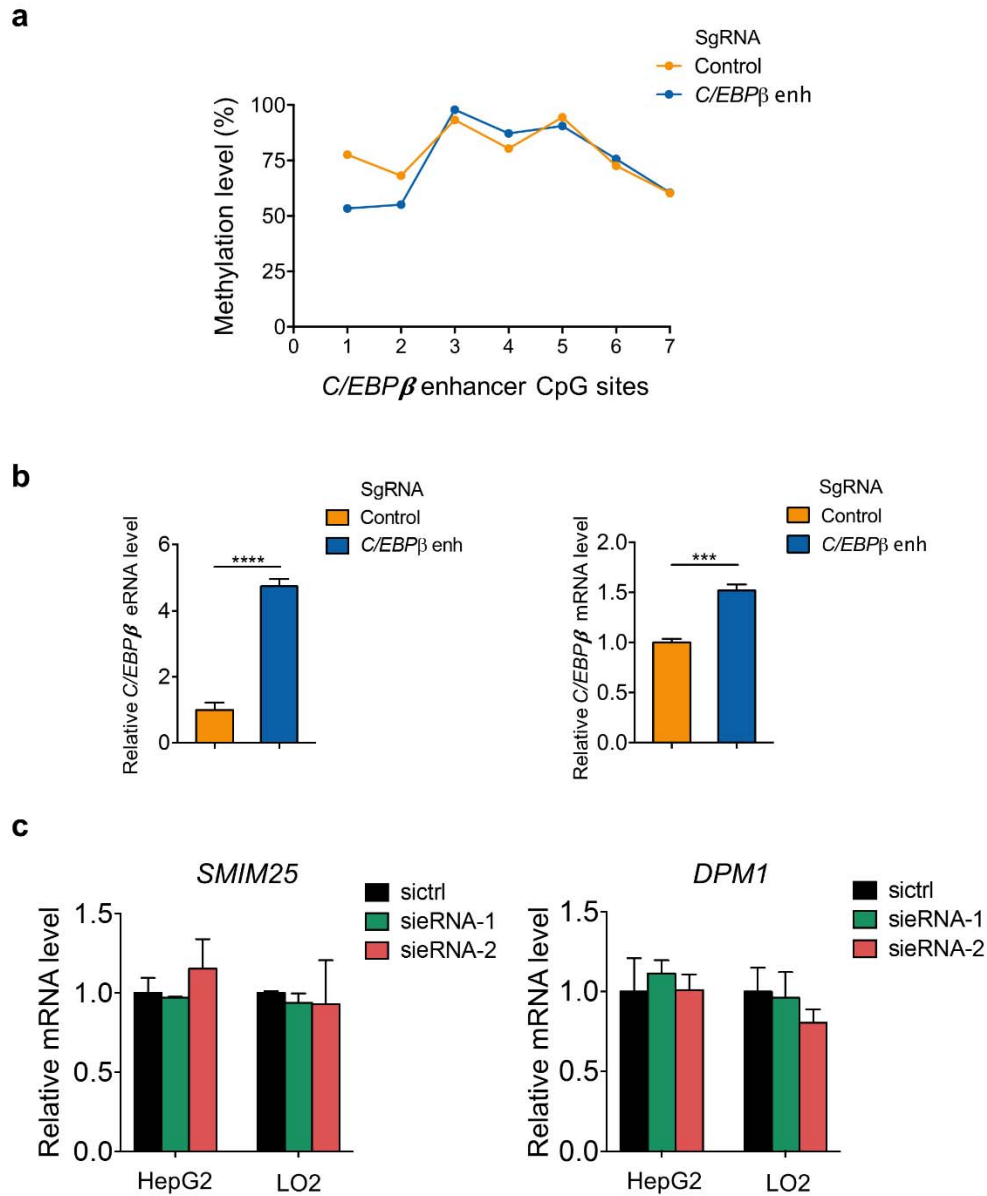

**Supplementary Figure 3.** (a) Pyrosequencing and (b) qRT-PCR analyses of SK-Hep1 cells transfected with pPlatTET-gRNA2 and sgRNA-expressing vectors targeting control sequence or *C/EBPβ* enhancer. Methylation levels of 7 CpG sites in *C/EBPβ* enhancer region 1 as depicted in Fig. 1g are shown. *C/EBPβ* eRNA/mRNA levels were calculated by the  $2^{-\Delta\Delta Ct}$  method using 18s rRNA as internal control, and are presented as fold-changes against the average values of the respective sgRNA control groups. (c) qRT-PCR analysis of *SMIM25* and *DPM1* (located upstream and downstream of *C/EBPβ* enhancer) mRNA expressions in two

liver cell lines upon siRNA-mediated knockdown of *C/EBPβ* mRNA. The mRNA levels were calculated by the  $2^{-\Delta\Delta Ct}$  method using 18s rRNA as internal control, and are presented as fold-changes against the average values of the respective siCtrl groups. Data are presented as mean  $\pm$  SD. \*\*\* $P < 0.001$ ; \*\*\*\* $P < 0.0001$  as calculated by unpaired two-tailed Student's *t*-test (b).

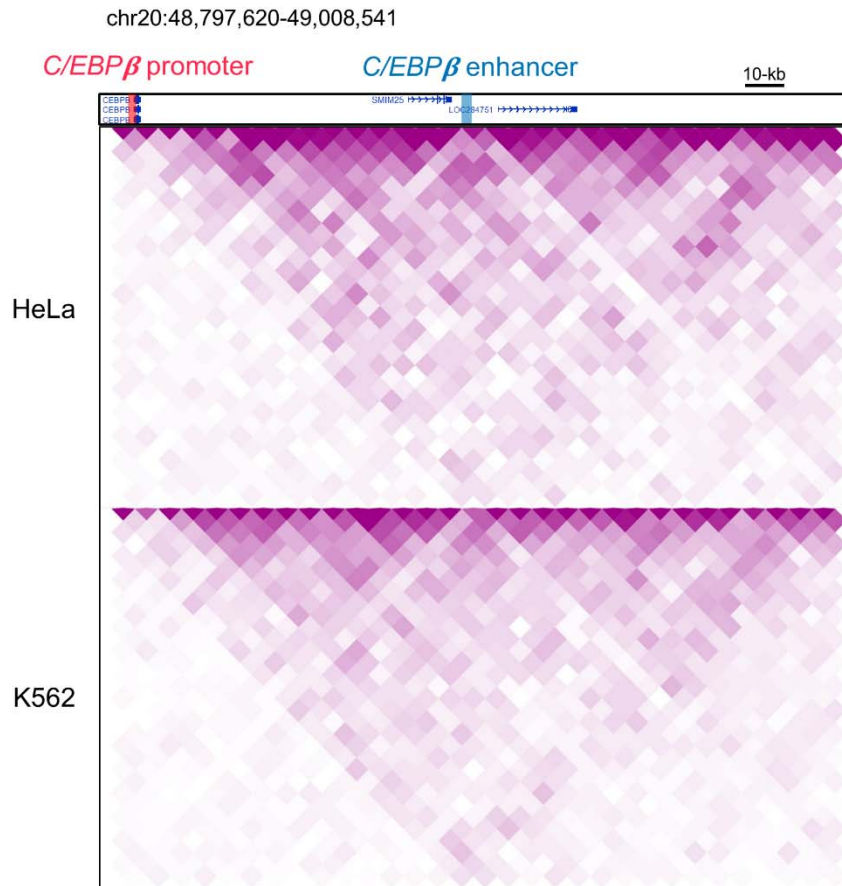

**Supplementary Figure 4.** *C/EBPβ* promoter and enhancer interaction based on Hi-C data in two biological replicates of human cell lines, HeLa (upper panel) and K562 (lower panel), visualized with bin size of 5-kb. Visualization of Hi-C signals predicts the span of topologically-associating domains with distinguished chromatin interactions.

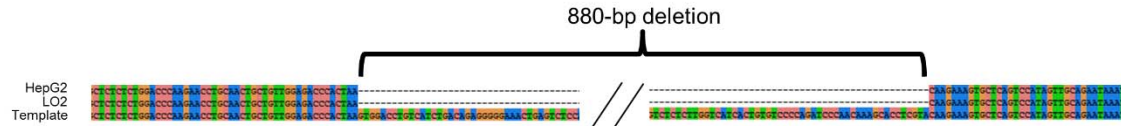

chr20:48,899,990-48,901,339

```

CAATCTCTCCCTCAGCCCTGACCATCCCGTGTCTTTTTCATAGGG
GGAGGGAAAGGCACCTCCAGGAGAGTGGACAGTGTGGCCAGGGCTTG
ACGTGTGGCAGCAAGAGGTTGGTGAGGGAGAGTGTGGAGCTGGGT
GGCTGAGCTTCAGGGGAGGATCTCCAGCAGGAGGATGACAGGCCAGG
GTCACCTGACTCCGTGAGCACTGGTTGTGTGACTCAGGGAGCTCTCT
CTGGACCAAGAACCCTGCAACTGCTGTGGAGCCCACTAAGTGGACCTG
TCATCTCAGAGAGGGGAACTGAGTCTCCAAAGCTCTCTCTGACCTG
CTGAAAGGGTCAGCCAGGATAGGGCAAAAGCGGGGCTTETAGCAGTC
ACTTGCACCTCAGTGGAGTGGTCTCTGGATTTCTGGCTCTCTGAG
CCCTAGACCCATGGGCTGGAGGCCAGTGTATGGCAGGCTGAGCC
TGGGCTGGAGTGGGCTGTCTAAGTCCGGCCAGCTCTCTCTGGG
CCCTGGCTCCCTGGAGGCTGTGGATTGCACAATACACCCACACCT
GTGACCAAGGAGCTGACACAGCTTCTGGAGCCACCTTGGGCGCTG
CAGCTCTGTCAAGACAGGGCCAGGATGGATGGATGACACCCGGCA
GATCTGACTGGAGAGTGACTCTCTGAGAGTGCACCTCTGGGCTG
TCTGACTCTGGCAAGTCACTTCCCTCTCTGAGCCCTTTTCTTCTT
GTAGAGGAGGTAATAGTGCCTCTCCCTGGCTCTGGAGGGATTGA
CTTCCGCCCCCATGCTGGCCCTCTGGCTGCTCTCAATGACCCGGG
ATCCCCACCCAGGCTCTGACCTCGGCTTCCCTTCTCTGGGCGGG
CCTTGCACCTCTTAAAGTCTGTCAAAAGTGGAGGTGATGAGGCT
TTGCTGGCTGGAGCTGGCTCTTACTGAATCTGGCTGATCTGCA
GTGCTACCTGACTCATGCTTCTGGCTCTTCTGCTACCCCTCTCTG
GCTGGCAGTCCATCTTCTCTCTTGGCTCATCTGCTCCCAAGATG
CCAAAGAGCACTGTAAGAGAGTGCTCAGTCCATAGTGCAGAATA
AATGAATGAATGAATGAATGAATGAATGGAAAGTCTAGCTCCAC
GCCGACCTTAGTAAACCTGAAACCAATGCCGTGTGGTGGTGTAG
CTTTGGCTCCGATTCTAGCCCATCCATCCACCTCATCAGCCGG
  
```

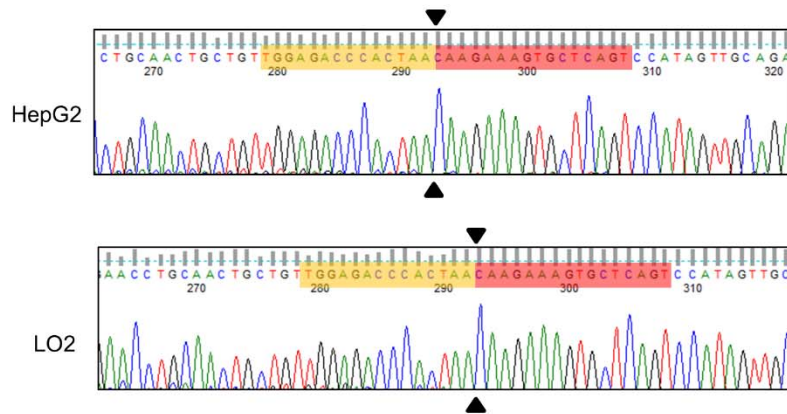

**Supplementary Figure 5.** Validation of CRISPR/Cas9-mediated deletion of *C/EBPβ* enhancer in two liver cell lines by Sanger sequencing.

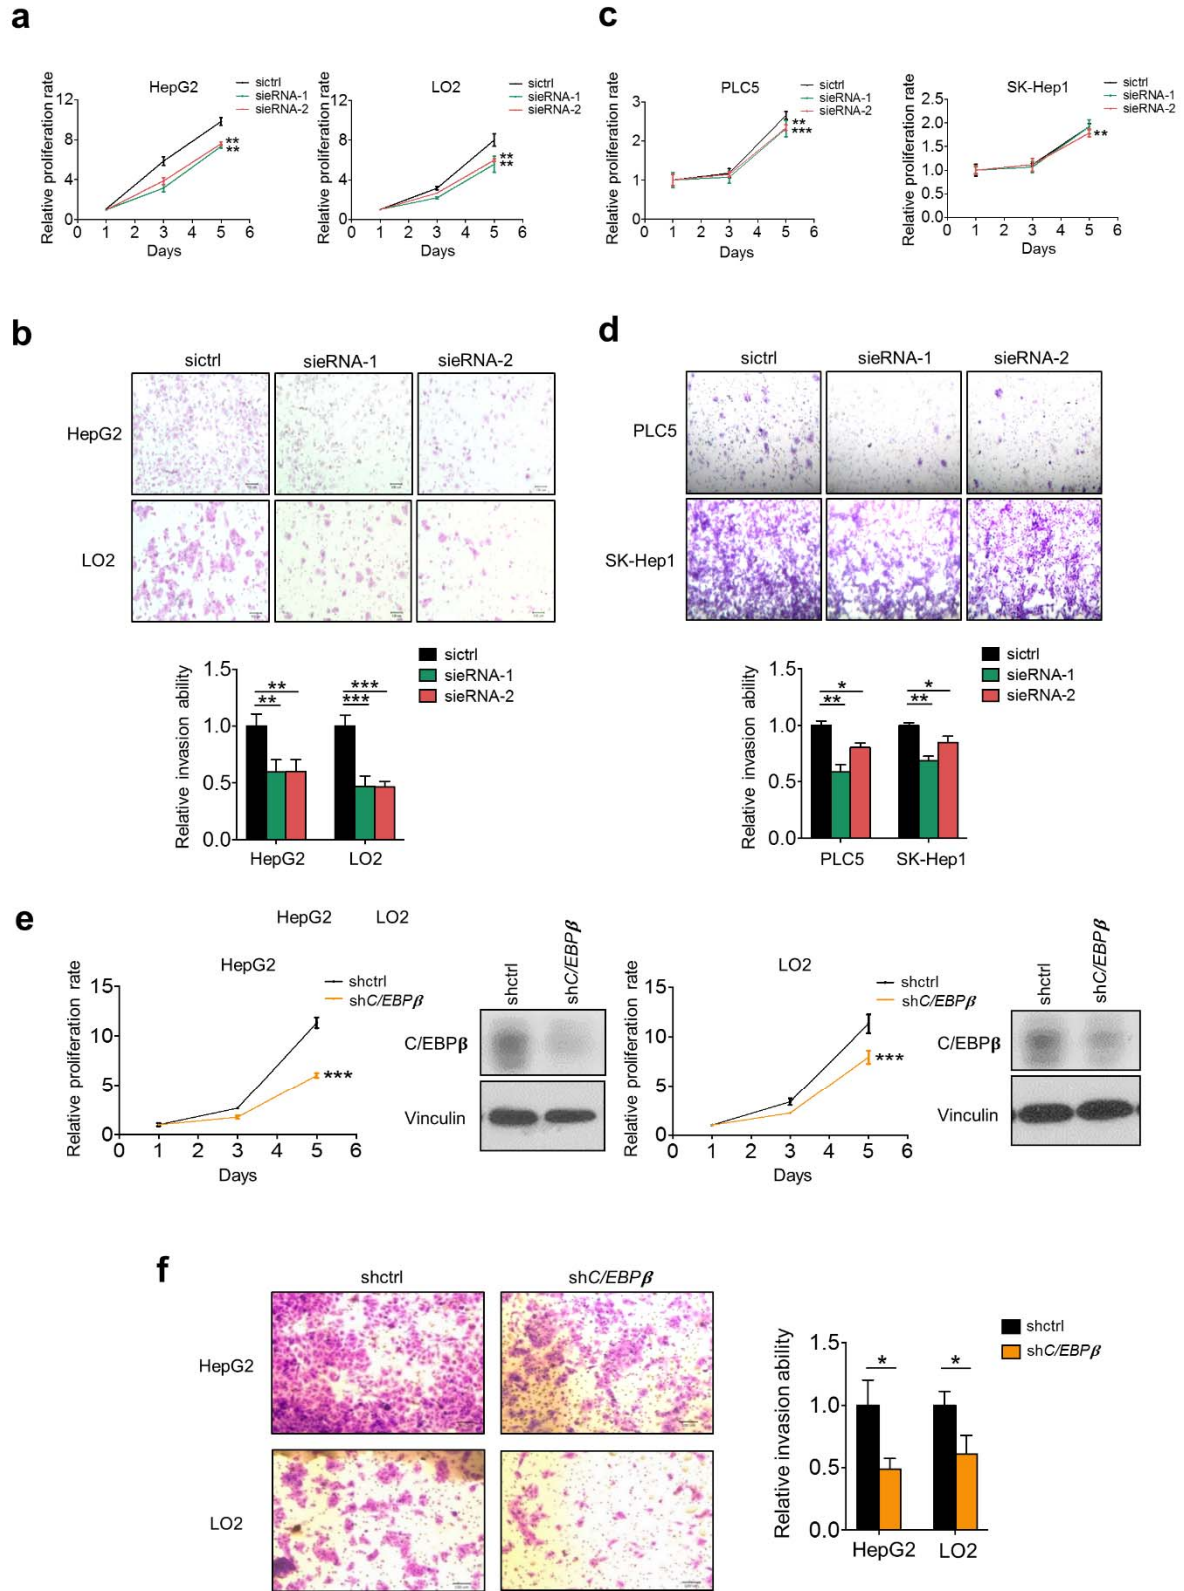

**Supplementary Figure 6.** Functional significance of *C/EBPβ* eRNA and mRNA in HCC. (a-

b) siRNA-mediated knockdown of *C/EBPβ* eRNA in HepG2 and LO2 liver cells impaired (a)



cellular proliferation and (b) cell invasion determined by MTS assay and Matrigel chambers, respectively. (c-d) In contrast, *C/EBP $\beta$*  eRNA knockdown in PLC5 and SK-Hep1 liver cells modestly reduced (c) cellular proliferation and (d) cell invasion determined by MTS assay and Matrigel chambers, respectively. (e-f) shRNA-mediated knockdown of *C/EBP $\beta$*  mRNA in liver cells decreased (e) cellular proliferation and (f) cell invasion determined by MTS assay and Matrigel chambers, respectively. Western blot analysis of *C/EBP $\beta$*  level in HepG2 and LO2 cells. Vinculin was used as loading control. Representative images of Gentian violet-stained invaded cells are shown in b, d and f. Data are presented as mean  $\pm$  SD. \* $P < 0.05$ ; \*\* $P < 0.01$ ; \*\*\* $P < 0.001$  as calculated by two-way ANOVA (a, c), and unpaired two-tailed Student's t-test (b, d-f).

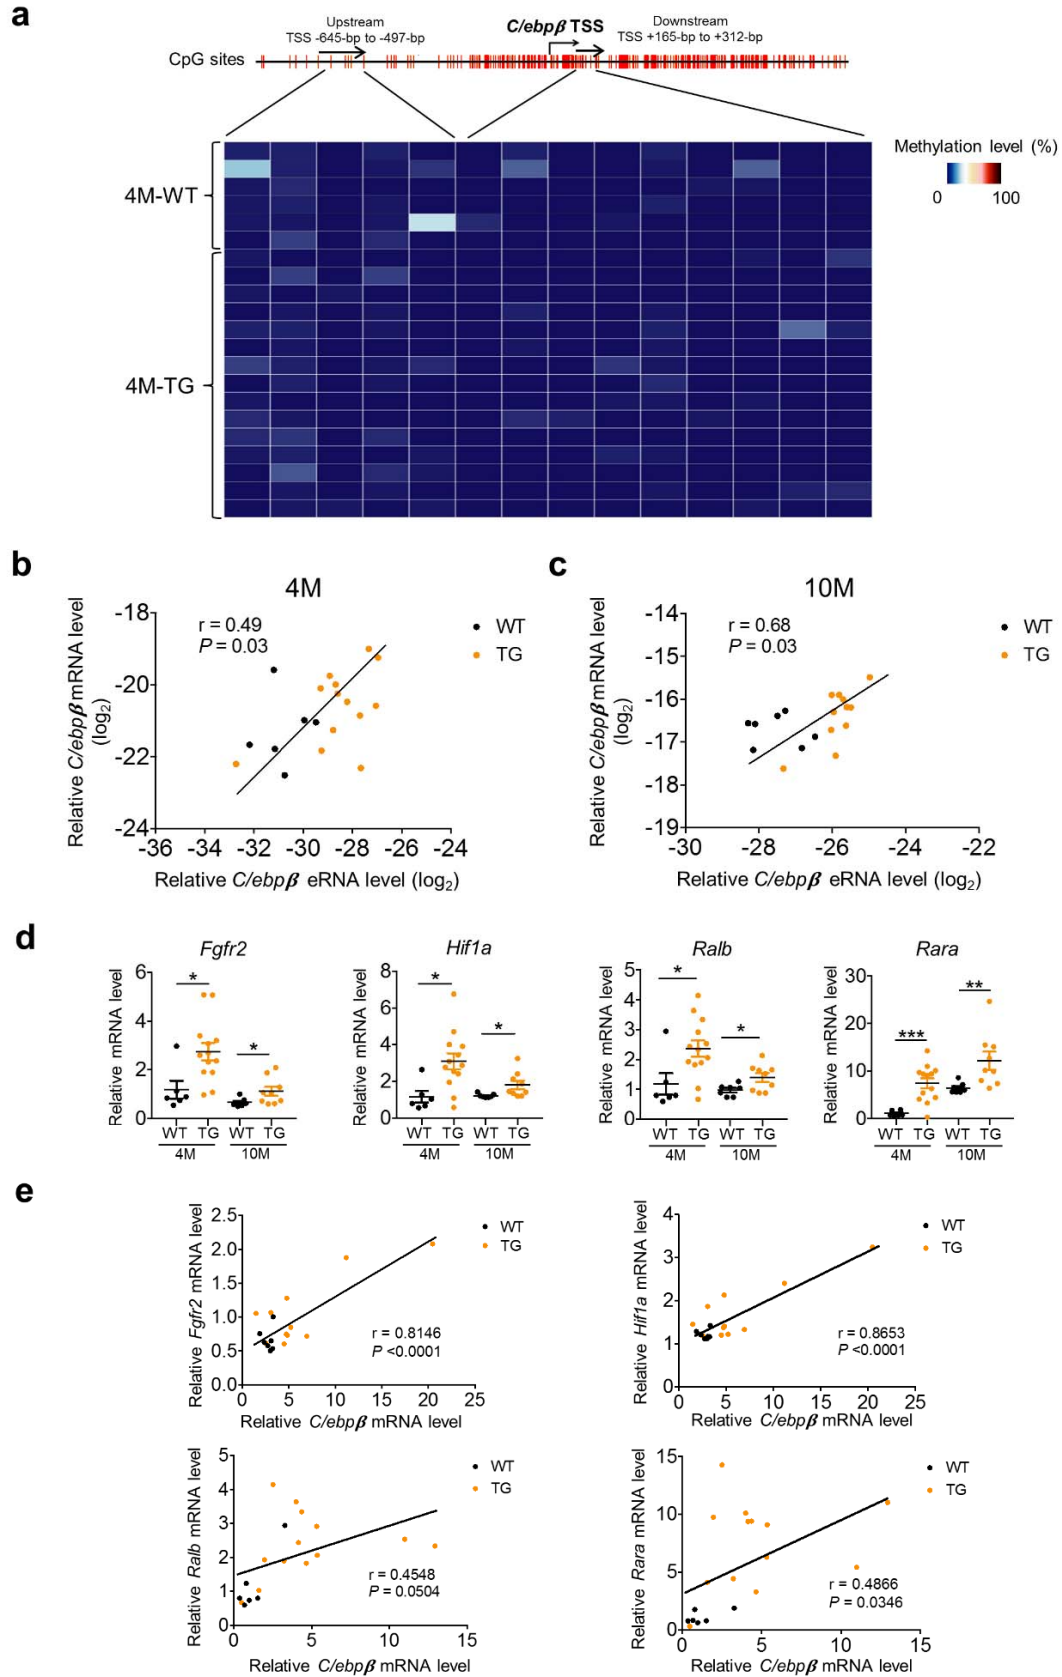

**Supplementary Figure 7.** Pyrosequencing and qRT-PCR analyses of murine *C/ebpβ* enhancer methylation, eRNA and mRNA expressions. (a) Methylation levels at individual CpG sites of

*C/ebpβ* promoter of liver tissues of 4-month-old WT and HBx TG mice by pyrosequencing. (b-c) Correlation between *C/ebpβ* eRNA and mRNA levels of (b) 4- and (c) 10-month-old WT and HBx TG mice denoted with Spearman correlation coefficients. (b-c) *C/ebpβ* mRNA levels are  $\Delta\text{Ct}$  values using 18s rRNA as internal control. (d) qRT-PCR analyses of *Fgfr2*, *Hif1a*, *Ralb*, and *Rara* expressions in the liver tissues of 4- and 10-month-old WT and HBx TG mice. The mRNA levels were calculated by the  $2^{-\Delta\Delta\text{Ct}}$  method using 18s rRNA as internal control, and are presented as fold-changes against the average value of the 4-month-old WT group. (e) Correlations between the expressions of *C/ebpβ* and HCC driver genes in the liver tissues of WT and HBx TG mice denoted with Pearson correlation coefficient ( $r$ ). The mRNA levels of *Ralb/Rara* and *Fgfr2/Hif1a* in 4- and 10-month-old mice, respectively, were calculated as in (d). \* $P < 0.05$ ; \*\* $P < 0.01$ ; \*\*\* $P < 0.001$  as calculated by Pearson correlation test (b, c, e), and unpaired two-tailed Student's t-test (d).

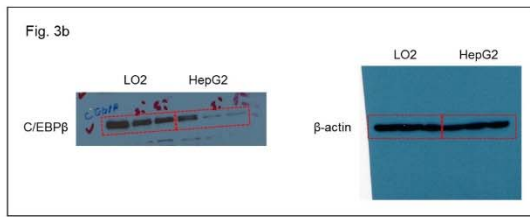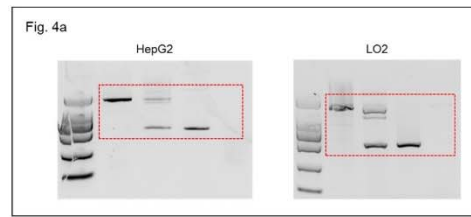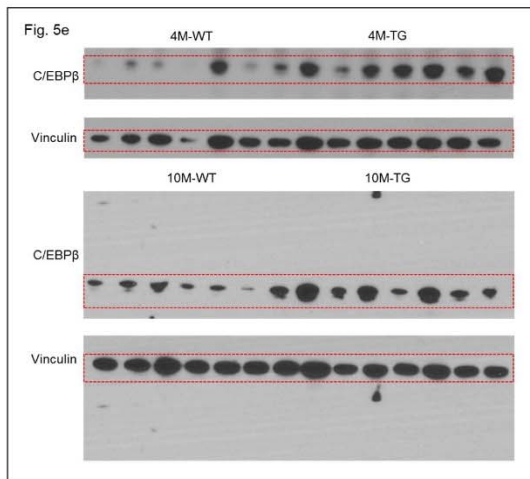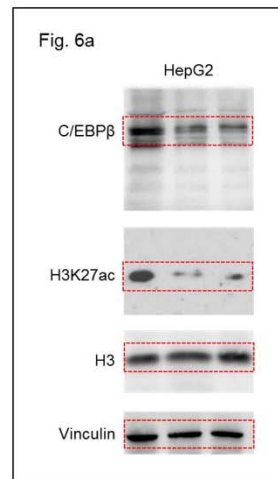

**Supplementary Figure 8.** Uncropped and unprocessed Western Blots. Dot line boxes indicate the cropped areas shown in the corresponding figures.

**Supplementary Table 1. Integrative epigenomic analysis reveals differentially-methylated enhancers in human HCCs**

| Enhancer location        | Methylation changes <sup>a</sup> | Target gene <sup>b</sup>       | Expression changes <sup>c</sup> | eRNA-mRNA correlation <sup>d</sup> |
|--------------------------|----------------------------------|--------------------------------|---------------------------------|------------------------------------|
| chr8:142105625-142105840 | -0.50                            | <i>SLC45A4</i>                 | 3.397349521                     | 0.816                              |
| chr8:142237099-142237665 | -0.24                            |                                |                                 | 0.836                              |
| chr16:11707277-11708060  | -0.47                            | <i>LITAF</i>                   | 1.419832002                     | 0.803                              |
| chr16:11692306-11692793  | -0.24                            |                                |                                 | 0.83                               |
| chr16:11705983-11706695  | -0.16                            |                                |                                 | 0.801                              |
| chr20:35964135-35964688  | -0.37                            | <i>SRC</i>                     | 3.886822647                     | 0.802                              |
| chr21:34752926-34753284  | -0.36                            | <i>IFNGR2</i>                  | 2.514799874                     | 0.839                              |
| chr3:182928659-182929484 | -0.28                            | <i>B3GNT5</i>                  | 7.516777301                     | 0.819                              |
| chr1:213090277-213090696 | -0.26                            | <i>FLVCR1</i>                  | 5.552759099                     | 0.866                              |
| chr15:81315785-81316530  | -0.25                            | <i>MESDC1</i>                  | 1.723013559                     | 0.883                              |
| chr6:13302642-13303798   | -0.25                            | <i>TBC1D7</i>                  | 3.331748742                     | 0.83                               |
| chr16:87987504-87988357  | -0.22                            | <i>BANP</i>                    | 1.215070263                     | 0.891                              |
| chr20:48900220-48901229  | -0.21                            | <i>C/EBP<math>\beta</math></i> | 1.271349807                     | 0.863                              |
| chr20:48888419-48889173  | -0.19                            |                                |                                 | 0.85                               |
| chr20:48887757-48888308  | -0.19                            |                                |                                 | 0.803                              |
| chr2:10471190-10471549   | -0.19                            | <i>HPCAL1</i>                  | 2.091328331                     | 0.853                              |
| chr20:47390467-47391044  | -0.19                            | <i>PREX1</i>                   | 1.739291664                     | 0.829                              |
| chr20:47376585-47377468  | -0.19                            |                                |                                 | 0.811                              |
| chr21:45566076-45566451  | -0.18                            | <i>ICOSLG</i>                  | 1.651557117                     | 0.817                              |
| chr3:10238203-10238635   | -0.17                            | <i>IRAK2</i>                   | 4.328592295                     | 0.839                              |
| chr1:27160002-27160387   | -0.15                            | <i>ZDHHC18</i>                 | 2.195928042                     | 0.948                              |
| chr6:44230828-44231731   | -0.12                            | <i>NFKBIE</i>                  | 2.145296308                     | 0.868                              |
| chr8:56798106-56798776   | -0.11                            | <i>LYN</i>                     | 2.154508688                     | 0.896                              |
| chr3:11314967-11316155   | -0.11                            | <i>ATG7</i>                    | 1.299000289                     | 0.815                              |
| chr17:38482426-38483282  | -0.10                            | <i>RARA</i>                    | 1.711086537                     | 0.857                              |
| chr21:40182920-40183779  | 0.11                             | <i>ETS2</i>                    | 0.331982605                     | 0.852                              |
| chr13:72438548-72439003  | 0.11                             | <i>DACHI</i>                   | 0.067484498                     | 0.823                              |

Footnotes:

- a. Average difference of beta value between tumor and normal liver samples
- b. Target gene based on FANTOM5 database
- c. Tumor vs. matched non-tumor ratio
- d. Expression correlation based on FANTOM5 database

**Supplementary Table 2. Clinicopathological information of the HCC patients**

| HCC patient samples used for genome-wide methylation analysis |        |     |          |               |          |                 |      |           |          |
|---------------------------------------------------------------|--------|-----|----------|---------------|----------|-----------------|------|-----------|----------|
| Patient no.                                                   | Sex    | Age | HBsAg    | $\alpha$ -HCV | NAFLD    | Differentiation | AJCC | Cirrhosis | Fibrosis |
| 190                                                           | male   | 51  | positive | negative      | negative | moderate        | 3    | yes       | no       |
| 293                                                           | male   | 45  | positive | n/a           | negative | moderate        | 1    | no        | yes      |
| 304                                                           | female | 67  | positive | n/a           | negative | moderate        | 1    | yes       | no       |
| 318                                                           | male   | 32  | positive | negative      | negative | poor            | 3    | no        | no       |
| 321                                                           | male   | 66  | positive | negative      | negative | poor            | 2    | no        | yes      |
| 328                                                           | male   | 51  | positive | negative      | negative | moderate        | 3    | yes       | yes      |
| 333                                                           | female | 67  | positive | negative      | negative | well            | 2    | yes       | no       |
| 339                                                           | female | 65  | positive | negative      | negative | well            | 1    | no        | yes      |
| 350                                                           | male   | 72  | negative | negative      | negative | moderate        | 1    | no        | no       |
| 353                                                           | male   | 73  | negative | positive      | negative | moderate        | 3    | yes       | yes      |
| 391                                                           | male   | 66  | positive | negative      | negative | poor            | 3    | yes       | yes      |
| 414                                                           | female | 72  | positive | n/a           | negative | poor            | 1    | yes       | n/a      |
| 419                                                           | female | 78  | negative | negative      | negative | moderate        | 1    | no        | no       |
| 432                                                           | male   | 33  | positive | n/a           | negative | poor            | 3    | no        | yes      |
| 433                                                           | male   | 40  | positive | negative      | negative | moderate        | 3    | yes       | yes      |
| 434                                                           | female | 45  | positive | n/a           | negative | well            | 1    | no        | yes      |
| 442                                                           | male   | 72  | positive | negative      | negative | moderate        | 2    | yes       | yes      |
| 447                                                           | female | 71  | positive | n/a           | negative | moderate        | 2    | yes       | yes      |
| 458                                                           | male   | 68  | negative | positive      | negative | well            | 1    | yes       | yes      |
| 464                                                           | male   | 68  | positive | n/a           | negative | well            | 1    | yes       | no       |
| 469                                                           | female | 67  | negative | negative      | negative | moderate        | 1    | yes       | yes      |
| 485                                                           | male   | 43  | positive | positive      | negative | moderate        | 2    | yes       | yes      |
| 495                                                           | female | 60  | positive | n/a           | negative | well            | 1    | no        | yes      |
| 506                                                           | male   | 57  | positive | negative      | negative | moderate        | 3    | yes       | yes      |
| 524                                                           | male   | 39  | positive | n/a           | negative | n/a             | 2    | yes       | no       |
| 531                                                           | male   | 68  | positive | negative      | negative | well            | 1    | no        | no       |
| 534                                                           | female | 45  | positive | negative      | negative | moderate        | 2    | no        | no       |
| 551                                                           | male   | 70  | positive | n/a           | negative | moderate        | 1    | no        | no       |
| 663                                                           | male   | 63  | positive | negative      | negative | moderate        | 1    | yes       | no       |
| 672                                                           | male   | 63  | positive | negative      | negative | moderate        | 3    | yes       | no       |
| 675                                                           | male   | 63  | positive | negative      | negative | well            | 1    | yes       | no       |
| 676                                                           | male   | 61  | positive | negative      | negative | moderate        | 3    | no        | no       |
| 688                                                           | female | 63  | positive | negative      | negative | moderate        | 1    | yes       | no       |
| 705                                                           | male   | 75  | negative | negative      | positive | moderate        | 3    | yes       | n/a      |
| 741                                                           | female | 74  | negative | negative      | positive | moderate        | 3    | no        | n/a      |
| 768                                                           | male   | 55  | negative | negative      | positive | moderate        | 3    | yes       | n/a      |

**Supplementary Table 2. (continued)**

| HCC patient samples used for pyrosequencing |      |     |          |               |          |                 |      |           |          |
|---------------------------------------------|------|-----|----------|---------------|----------|-----------------|------|-----------|----------|
| Patient no.                                 | Sex  | Age | HBsAg    | $\alpha$ -HCV | NAFLD    | Differentiation | AJCC | Cirrhosis | Fibrosis |
| 213                                         | male | 36  | positive | n/a           | negative | moderate        | 1    | no        | yes      |
| 214                                         | male | 58  | positive | n/a           | negative | poor            | 1    | no        | yes      |
| 285                                         | male | 50  | positive | negative      | negative | moderate        | 2    | no        | yes      |
| 305                                         | male | 68  | positive | negative      | negative | poor            | 1    | no        | yes      |
| 306                                         | male | 40  | positive | n/a           | negative | moderate        | 1    | no        | yes      |
| 313                                         | male | 43  | positive | n/a           | negative | poor            | 1    | yes       | no       |
| 315                                         | male | 60  | positive | negative      | negative | poor            | 1    | no        | yes      |
| 323                                         | male | 65  | positive | n/a           | negative | moderate        | 1    | yes       | no       |
| 324                                         | male | 64  | positive | n/a           | negative | moderate        | 1    | no        | yes      |
| 329                                         | male | 56  | positive | negative      | negative | moderate        | 1    | yes       | yes      |
| 332                                         | male | 45  | positive | n/a           | negative | moderate        | 1    | no        | yes      |
| 338                                         | male | 59  | positive | negative      | negative | moderate        | 1    | yes       | yes      |
| 376                                         | male | 36  | positive | negative      | negative | well            | 1    | no        | yes      |
| 391                                         | male | 66  | positive | negative      | negative | poor            | 3    | yes       | yes      |
| 395                                         | male | 55  | positive | negative      | negative | moderate        | 2    | no        | yes      |
| 396                                         | male | 70  | positive | n/a           | negative | moderate        | 1    | yes       | n/a      |
| 412                                         | male | 27  | positive | n/a           | negative | moderate        | 1    | no        | yes      |
| 418                                         | male | 59  | positive | negative      | negative | moderate        | 1    | no        | yes      |
| 425                                         | male | 38  | positive | n/a           | negative | moderate        | 1    | no        | yes      |
| 427                                         | male | 53  | positive | negative      | negative | moderate        | 1    | no        | yes      |
| 435                                         | male | 60  | positive | negative      | negative | moderate        | 1    | yes       | yes      |
| 437                                         | male | 50  | positive | n/a           | negative | moderate        | 1    | no        | yes      |
| 441                                         | male | 59  | positive | n/a           | negative | moderate        | 1    | no        | yes      |
| 443                                         | male | 65  | positive | n/a           | negative | moderate        | 2    | yes       | no       |
| 444                                         | male | 42  | positive | n/a           | negative | moderate        | 1    | yes       | yes      |
| 463                                         | male | 43  | positive | negative      | negative | poor            | 1    | no        | yes      |
| 488                                         | male | 60  | positive | negative      | negative | moderate        | 3    | yes       | no       |
| 493                                         | male | 50  | positive | n/a           | negative | moderate        | 1    | no        | n/a      |
| 498                                         | male | 47  | positive | n/a           | negative | moderate        | 1    | yes       | yes      |
| 499                                         | male | 53  | positive | negative      | negative | moderate        | 1    | no        | no       |
| 500                                         | male | 49  | positive | n/a           | negative | moderate        | 1    | yes       | yes      |
| 512                                         | male | 48  | positive | n/a           | negative | moderate        | 1    | yes       | no       |
| 515                                         | male | 60  | positive | n/a           | negative | moderate        | 3    | yes       | yes      |
| 524                                         | male | 39  | positive | n/a           | negative | n/a             | 2    | yes       | no       |
| 529                                         | male | 59  | positive | negative      | negative | moderate        | 1    | no        | no       |
| 531                                         | male | 68  | positive | negative      | negative | well            | 1    | no        | no       |
| 548                                         | male | 56  | positive | n/a           | negative | moderate        | 2    | yes       | no       |
| 564                                         | male | 61  | positive | n/a           | negative | moderate        | 1    | yes       | no       |
| 566                                         | male | 51  | positive | negative      | negative | moderate        | 1    | yes       | yes      |
| 567                                         | male | 42  | positive | n/a           | negative | moderate        | 2    | yes       | no       |
| 570                                         | male | 43  | positive | negative      | negative | moderate        | 1    | no        | yes      |
| 581                                         | male | 50  | positive | n/a           | negative | moderate        | 3    | yes       | no       |
| 588                                         | male | 77  | positive | n/a           | negative | well            | 1    | yes       | no       |
| 591                                         | male | 62  | positive | negative      | negative | moderate        | 1    | no        | yes      |
| 593                                         | male | 50  | N/A      | n/a           | negative | moderate        | 1    | yes       | yes      |
| 597                                         | male | 49  | positive | n/a           | negative | moderate        | 3    | no        | no       |
| 620                                         | male | 58  | positive | n/a           | negative | moderate        | 1    | yes       | n/a      |
| 655                                         | male | 66  | positive | negative      | negative | moderate        | 1    | yes       | no       |

**Supplementary Table 3. Primer sequences**

| <b>Primer name</b> | <b>Species</b> | <b>Sequence 5'-3'</b>   | <b>Application</b> |
|--------------------|----------------|-------------------------|--------------------|
| CEBPB-F            | human          | AGAAGACCGTGGACAAGCACAG  | qRT-PCR            |
| CEBPB-R            | human          | CTCCAGGACCTTGTGCTGCGT   | qRT-PCR            |
| CEBPB-eRNA-F       | human          | TGACTCTGGGCAAGTCACTT    | qRT-PCR            |
| CEBPB-eRNA-R       | human          | GGCAGAGTCAATCCCTCCAA    | qRT-PCR            |
| 18s-rRNA-F         | human          | CAGCCACCCGAGATTGAGCA    | qRT-PCR            |
| 18s-rRNA-R         | human          | TAGTAGCGACGGGCGGTGTG    | qRT-PCR            |
| SMIM25-F           | human          | GGTGGGGATTTTGTGTGTT     | qRT-PCR            |
| SMIM25-R           | human          | GGAGAGGGGATTTCTGGAAG    | qRT-PCR            |
| DPM1-F             | human          | GTCTCTGGAACTCGCTACAAAGG | qRT-PCR            |
| DPM1-R             | human          | ATCAGATGCTCCTGGTCTCAGC  | qRT-PCR            |
| Cebpb-F            | mouse          | CAACCTGGAGACGCAGCACAAG  | qRT-PCR            |
| Cebpb-R            | mouse          | GCTTGAACAAGTTCCGCAGGGT  | qRT-PCR            |
| Fgfr2-F            | mouse          | GTCTCCGAGTATGAGTTGCCAG  | qRT-PCR            |
| Fgfr2-R            | mouse          | CCACTGCTTCAGCCATGACTAC  | qRT-PCR            |
| Hif1a-F            | mouse          | CCTGCACTGAATCAAGAGGTTGC | qRT-PCR            |
| Hif1a-R            | mouse          | CCATCAGAAGGACTTGCTGGCT  | qRT-PCR            |
| Ralb-F             | mouse          | GGTGTGCAGTACGTGGAGACAT  | qRT-PCR            |
| Ralb-R             | mouse          | GCTTTTCCTGCCGTTCTTGTC   | qRT-PCR            |
| Rara-F             | mouse          | GCTTCCAGTCAGTGGTTACAGC  | qRT-PCR            |
| Rara-R             | mouse          | CAAAGCAAGGCTTGTAGATGCGG | qRT-PCR            |
| 18s-rRNA-F         | mouse          | GTAACCCGTTGAACCCCAT     | qRT-PCR            |
| 18s-rRNA-R         | mouse          | CCATCCAATCGGTAGTAGCG    | qRT-PCR            |



**Supplementary Table 4. Sequencing qualities of ChIP samples**

| Sample                                 | Antibody | Total reads | Mapped reads | Peaks  | NSC      | RSC      |
|----------------------------------------|----------|-------------|--------------|--------|----------|----------|
| HepG2 <i>C/EBPβ</i> enh <sup>-/-</sup> | H3K27ac  | 27,314,264  | 27,314,264   | 54,328 | 1.554263 | 1.082269 |
| HepG2 WT                               | H3K27ac  | 25,579,504  | 25,579,504   | 57,481 | 1.292644 | 1.06017  |
| HepG2 <i>C/EBPβ</i> enh <sup>-/-</sup> | CEBPB    | 24,966,010  | 24,966,010   | 16,345 | 1.02207  | 1.172833 |
| HepG2 WT                               | CEBPB    | 26,030,358  | 26,030,358   | 19,240 | 1.031545 | 1.219591 |
| HepG2 <i>C/EBPβ</i> enh <sup>-/-</sup> | BRD4     | 26,379,848  | 26,379,848   | 24,954 | 1.019824 | 1.108922 |
| HepG2 WT                               | BRD4     | 26,030,358  | 26,030,358   | 19,240 | 1.031545 | 1.219591 |

## **Supplementary Methods**

### **MBDCap-seq**

Methylated DNA was eluted by the MethylMiner Methylated DNA Enrichment Kit (Invitrogen) according to the manufacturer's instructions. MBDCap libraries for sequencing were prepared following standard protocols as described previously<sup>1</sup>. Sequencing was done using the Illumina Genome Analyzer II (GA II) up to 36 cycles for mapping to the human genome reference sequence. Image analysis and base calling were carried out with the standard Illumina pipeline. Raw tags were aligned to human reference genome hg19 by Bowtie2 v2.0.0-beta6<sup>2</sup>. DMRs were identified by the R package MEDIPS v1.30.0<sup>3</sup> after removing known copy number variation regions in HCC from our and other published studies<sup>4, 5, 6, 7</sup>. Functional annotation of the DMRs was performed by the R package Annotatr v1.4.0<sup>8</sup>.

### **WGBS**

Raw reads were aligned to human reference genome hg19 by Bismark v0.14.3<sup>9</sup>. DMRs were detected by Metilene v0.2-6<sup>10</sup>. We further filtered the DMRs by 1) length (>300-bp long), 2) CpG number (at least 8 CpG sites), 3) coverage (>10x), and 4) an average difference of beta value between tumor and normal liver samples not less than 0.1. Functional annotation of the DMRs was performed by the R package Annotatr v1.4.0<sup>8</sup>. Circular visualization was performed by Circos v0.69-6<sup>11</sup>. The set of all human enhancers identified by FANTOM5<sup>12</sup> was used to identify DMEs, defined as enhancers with at least 10 CpG sites having 10x read coverage, and an average difference of beta value between tumor and non-tumor samples not less than 0.1.

### **Nanoscale chromatin profiling and data analysis**

Nanoscale chromatin profiling was performed as described previously<sup>13</sup>. Tissues were fixed in 1% formaldehyde for 10 min at room temperature. Fixation was stopped by addition of glycine

to a final concentration of 125 nM. Tissue pieces were washed 3 times with TBSE buffer. Pulverized tissues were lysed in 100  $\mu$ l of lysis buffer and sonicated for 16 cycles (30s on, 30s off) using a Bioruptor (Diagenode). The total volume of chromatin immunoprecipitation (ChIP) was 1 ml and the amount of antibody used was 2  $\mu$ g. The input DNA was precleared with protein G Dynabeads (Life Technologies) for 1 h at 4°C and then incubated with antibodies conjugated protein G beads overnight at 4°C. The beads were washed 3 times with cold wash buffer. After recovery of ChIP and input DNA, whole-genome amplification was performed using the WGA4 kit (Sigma-Aldrich) and BpmI-WGA primers. Amplified DNA was digested with BpmI (New England Biolab). After that, 30 ng of the amplified DNA was used with the NEBNext ChIP-seq library prep reagent set (New England Biolab). Each library was sequenced to an average depth of 20 to 30 million raw reads on HiSeq4000 using 100-bp pair-end reads. Sequencing tags were mapped against the human reference genome using bowtie2 v2.2.9<sup>2</sup>. Reads were trimmed 10-bp from the front and the back to produce 80-bp. Only reads with mapQ >10 and with duplicates removed by rmdup were used for subsequent analysis. Significant peaks were called using MACS2 v2.1.0<sup>14</sup> and then the bedGraph files were fixed and converted to bigwig files with UCSC tools (bedClip, bed-Graph-ToBigWig; <http://hgdownload.cse.ucsc.edu/downloads.html>). Enhancer regions were identified by H3K27ac peaks and assigned to the nearest genes by GREAT<sup>15</sup>. Super-enhancers were defined on the basis of H3K27ac signal intensity and density<sup>16, 17, 18</sup>. Signal visualization were performed by IGV<sup>19</sup> and ngs.plot<sup>20</sup>. The primary antibodies for ChIP are CEBPB (sc-150, Santa Cruz Biotechnology, 1:100), BRD4 (39909, Active Motif, 1:500), H3K27ac (39133, Active Motif, 1:500), and Normal Rabbit IgG (2729, Cell Signaling Technology, 1:500). The sequencing qualities of ChIP samples are shown in Supplementary Table 4.

## **RNA-seq and data analysis**

Briefly, sequencing libraries were sequenced on HiSeq4000 sequencer (Illumina). Paired-end reads (101-bp) were aligned to hg19 reference genome using aligner tophat v2.0.13<sup>21</sup>. Differential transcript expression pattern discovery was performed using Cufflinks in edgeR<sup>22</sup>,

23.

## Supplementary References

1. Zuo T, *et al.* Epigenetic silencing mediated through activated PI3K/AKT signaling in breast cancer. *Cancer research* **71**, 1752-1762 (2011).
2. Langmead B, Salzberg SL. Fast gapped-read alignment with Bowtie 2. *Nature methods* **9**, 357-359 (2012).
3. Lienhard M, Grimm C, Morkel M, Herwig R, Chavez L. MEDIPS: genome-wide differential coverage analysis of sequencing data derived from DNA enrichment experiments. *Bioinformatics* **30**, 284-286 (2014).
4. Wong N, *et al.* Genomic aberrations in human hepatocellular carcinomas of differing etiologies. *Clinical cancer research : an official journal of the American Association for Cancer Research* **6**, 4000-4009 (2000).
5. Jia D, *et al.* Genome-wide copy number analyses identified novel cancer genes in hepatocellular carcinoma. *Hepatology* **54**, 1227-1236 (2011).
6. Guichard C, *et al.* Integrated analysis of somatic mutations and focal copy-number changes identifies key genes and pathways in hepatocellular carcinoma. *Nature genetics* **44**, 694-698 (2012).
7. Wang K, *et al.* Genomic landscape of copy number aberrations enables the identification of oncogenic drivers in hepatocellular carcinoma. *Hepatology* **58**, 706-717 (2013).
8. Cavalcante RG, Sartor MA. annotatr: genomic regions in context. *Bioinformatics* **33**, 2381-2383 (2017).
9. Krueger F, Andrews SR. Bismark: a flexible aligner and methylation caller for Bisulfite-Seq applications. *Bioinformatics* **27**, 1571-1572 (2011).

10. Juhling F, Kretzmer H, Bernhart SH, Otto C, Stadler PF, Hoffmann S. metilene: fast and sensitive calling of differentially methylated regions from bisulfite sequencing data. *Genome research* **26**, 256-262 (2016).
11. Krzywinski M, *et al.* Circos: an information aesthetic for comparative genomics. *Genome research* **19**, 1639-1645 (2009).
12. Andersson R, *et al.* An atlas of active enhancers across human cell types and tissues. *Nature* **507**, 455-461 (2014).
13. Yao X, *et al.* VHL Deficiency Drives Enhancer Activation of Oncogenes in Clear Cell Renal Cell Carcinoma. *Cancer discovery* **7**, 1284-1305 (2017).
14. Zhang Y, *et al.* Model-based analysis of ChIP-Seq (MACS). *Genome biology* **9**, R137 (2008).
15. McLean CY, *et al.* GREAT improves functional interpretation of cis-regulatory regions. *Nature biotechnology* **28**, 495-501 (2010).
16. Hnisz D, *et al.* Super-enhancers in the control of cell identity and disease. *Cell* **155**, 934-947 (2013).
17. Loven J, *et al.* Selective inhibition of tumor oncogenes by disruption of super-enhancers. *Cell* **153**, 320-334 (2013).
18. Chapuy B, *et al.* Discovery and characterization of super-enhancer-associated dependencies in diffuse large B cell lymphoma. *Cancer cell* **24**, 777-790 (2013).
19. Robinson JT, *et al.* Integrative genomics viewer. *Nature biotechnology* **29**, 24-26 (2011).
20. Shen L, Shao N, Liu X, Nestler E. ngs.plot: Quick mining and visualization of next-generation sequencing data by integrating genomic databases. *BMC genomics* **15**, 284 (2014).

21. Kim D, Pertea G, Trapnell C, Pimentel H, Kelley R, Salzberg SL. TopHat2: accurate alignment of transcriptomes in the presence of insertions, deletions and gene fusions. *Genome biology* **14**, R36 (2013).
22. Trapnell C, *et al.* Differential gene and transcript expression analysis of RNA-seq experiments with TopHat and Cufflinks. *Nature protocols* **7**, 562-578 (2012).
23. Robinson MD, McCarthy DJ, Smyth GK. edgeR: a Bioconductor package for differential expression analysis of digital gene expression data. *Bioinformatics* **26**, 139-140 (2010).
